# Supplementary material
Source: publisher figshare collection journal article supplement (https://acs.figshare.com/ndownloader/files/4585606)
Supplement: Supplementary file 1 [file 4585606]

# Fast synthesis of Cu<sub>2</sub>O hollow microspheres and their application in DNA biosensor of hepatitis B virus

*Haitao Zhu,<sup>\*,†,‡</sup> Jixin Wang,<sup>†,‡</sup> Guiyun Xu<sup>§</sup>*

<sup>†</sup>College of Material Science and Engineering, Qingdao University of Science and Technology,  
Qingdao, 266042, P. R. China.

<sup>‡</sup>State Key Laboratory Breeding Base of Photocatalysis, Fuzhou University,  
Fuzhou, 350002, P. R. China

<sup>§</sup> College of Chemistry and Molecular Engineering, Qingdao University of Science and Technology,  
Qingdao, 266042, P. R. China.

## ELECTROCHEMICAL EXPERIMENT

### Reagents and materials

All the DNA sequences were supplied by the Beijing SBS Gene Technology Limited Company. Their base sequences were as below:

Probe DNA: 5'-AAT GTG CTC CCC CAA CTC CTC-3'

Target DNA: 5'-GAG GAG TTG GGG GAG CAC ATT-3'

3 base mismatch to Probe DNA: 5'-GAC GAG TTG CGG GAG CTC ATT-3'

Non-complementary to Probe DNA: 5'-AAA AGG TGT AAG CGT TTG CCG-3'

The target DNA for DNA biosensor is the HBV gene sequences: 21-base target DNA sequences (target ssDNA, namely a 21-base fragment of HBV gene sequences). The probe DNA is the sequences completely complementary with the target DNA. The mismatch DNA is shown with 3-mismatched bases underlined. Methylene blue (MB) and other chemicals were of analytical reagent grade.

### Electrode fabrication and modification.

Carbon paste was prepared by hand mixing of graphite powder with solid paraffin at a ratio of 4/1 (w/w) in a mortar at 65 °C. The homogeneous carbon paste was packed into a glass tube ( $\Phi = 3.5$  mm) and cooled down to the ambient temperature. The electrical contact was got with a copper wire connected to the paste in the tube (Figure S1a). After the surface of electrode was polished, carbon paste electrode (CPE) was obtained. Hollow Cu<sub>2</sub>O suspension (typical sample) was dropped onto the glossily surface of inverted CPE and air-dried at room temperature. A film of hollow Cu<sub>2</sub>O hollow spheres was formed on the surface of CPE, and the modified electrode was denoted as Cu<sub>2</sub>O/CPE (Figure S1b). The electrode was rinsed with B-R buffer solution (a mixture of H<sub>3</sub>PO<sub>4</sub>, HOAc, and H<sub>3</sub>BO<sub>3</sub> (each of 0.04 mol/L) adjusted by 0.2 mol/L NaOH to pH of 7).

### Immobilization of ssDNA probe on modified CPE.

20  $\mu$ L of probe ssDNA ( $5 \times 10^{-6}$  mol L<sup>-1</sup>) was dropped onto the Cu<sub>2</sub>O/CPE surface. The probe DNA droplet was air-dried at room temperature for 1 h and then rinsed with B-R buffer solution to remove the

un-immobilized DNA. The ssDNA probe modified CPE denoted as ssDNA/Cu<sub>2</sub>O/CPE (Figure S1c). After that, the electrode was washed with water and rinsed with B-R buffer solution before hybridization.

### Hybridization of the electrode and electrochemical detection

Hybridization reaction was carried out by immersing the ssDNA/Cu<sub>2</sub>O/CPE electrode into 2×SSC hybridization buffer solution (0.3 mol·L<sup>-1</sup> sodium chloride-0.03 mol·L<sup>-1</sup> sodium citrate) with different concentration of the target DNA for 40 min at 40 °C. Then the electrode was washed with B-R buffer to remove the un-hybridized DNA, and used as working electrode. The response signal of MB was measured by using differential pulse voltammetry (DPV) after the working electrode was immersed in B-R buffer (pH 7.0) containing  $2.0 \times 10^{-5}$  mol L<sup>-1</sup> MB with 0.02 mol L<sup>-1</sup> NaCl. Similar procedures were also repeated using the 3-base-mismatched DNA sequences and Non-complementary DNA sequences, respectively. The principal steps for the immobilization, hybridization and detection of DNA are showed in Figure 1.

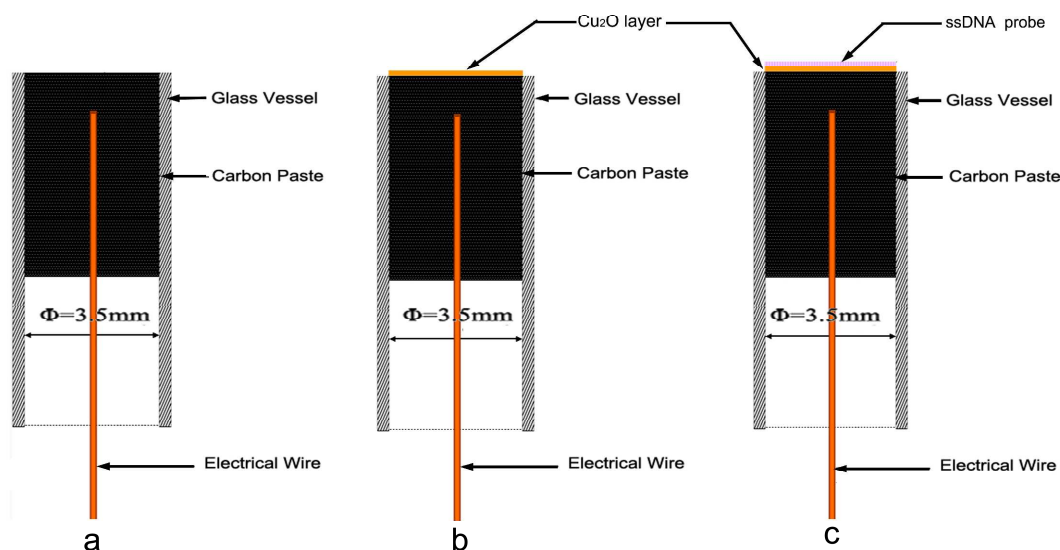

Figure S1. The schematic structure and SEM of CPE (a), Cu<sub>2</sub>O/CPE (b), and ssDNA/Cu<sub>2</sub>O/CPE (c)

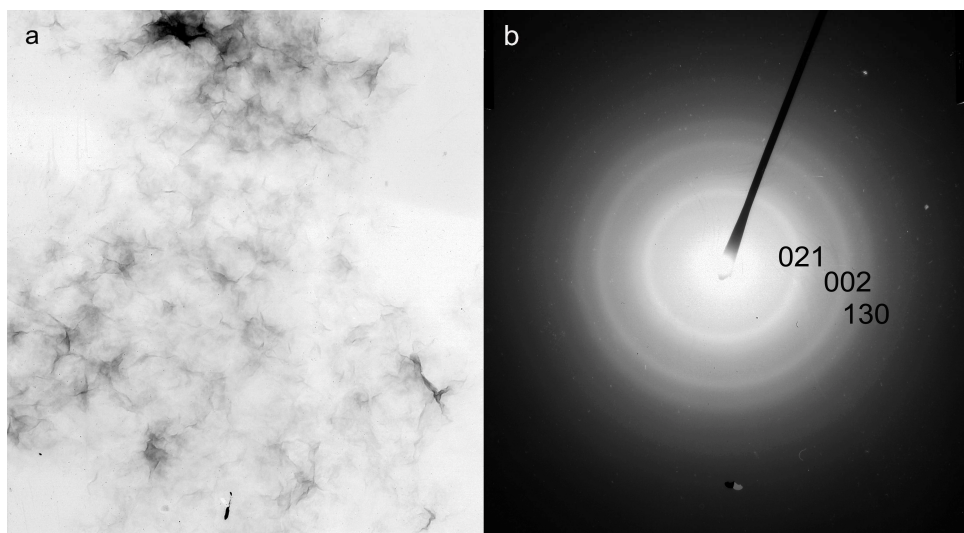

Figure S2. TEM image (a) and SAED pattern (b) of the interim product when NaOH solution with pH=12 was added and without adding  $\text{N}_2\text{H}_4\cdot\text{H}_2\text{O}$  solution. The three diffraction circles were indexed to 021, 002, and 130 of orthorhombic  $\text{Cu}(\text{OH})_2$  according to the literature (JCPDS, file no.35-0505).

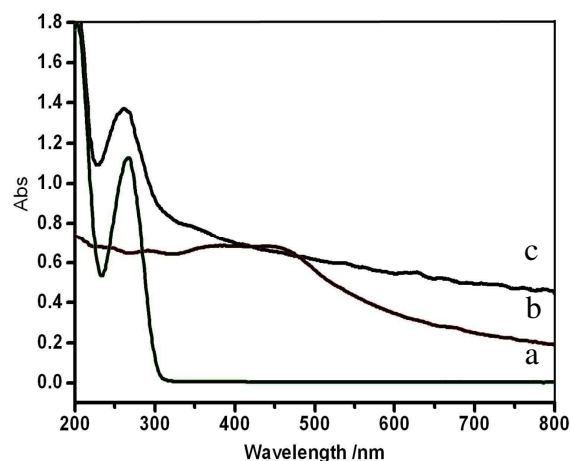

Figure S3. UV-Vis spectra of ssDNA (a),  $\text{Cu}_2\text{O}$  hollow sphere (b) and the  $\text{Cu}_2\text{O}$  labeled ssDNA (c). The absorption peak at about 260 nm in curve (a) was typical absorption of the ssDNA. The curve c was the sample obtained by centrifuging and washing with distilled water for twice after  $\text{Cu}_2\text{O}$  hollow sphere were dispersed in ssDNA solution for 30 min. A new absorption band at about 260 nm appeared in curve (c) as compared with the unlabeled  $\text{Cu}_2\text{O}$  hollow spheres (curve b), which was attributed to the typical absorption of DNA curve (a).
